# Supplementary material
Source: Research Square preprint supplement (doi:10.21203/rs.3.rs-9646646/v1)
Supplement: Supplementary file 1 [file 18c1d950de537223f7dd622b.docx]

**ESM3: “**Publications that did not meet inclusion criteria”

| **Reference** | **BRCA variant** | **LS variant** | **Ance stry / Ethni city** | **Phenotype** | **Gende r** | **Age at report (R), death (D), or last known tumor diagnosis (T)** | **Country of publication** | **Reason for exclusion** |
| --- | --- | --- | --- | --- | --- | --- | --- | --- |
| Beaty et al (2013)  <https://doi.org/1> 0.1002/pbc.245  09 | BRCA2 (N/R) | MLH1 c.589-2A>G | N/R | Localized tibial osteosarcom a, 13y and molecularly confirmed Fragile X syndrome | F | 13 (T) | Finland | No BRCA2  variant |
| Song et al (2014)  <https://doi.org/1> 0.1093/hmg/dd u172 | BRCA1 (N/R) | MSH6 (N/R) | N/R | Mucinous OC | F | N/R | UK & USA | No variants |
| BRCA1 (N/R) | MLH1 (N/R) | N/R | Clear-cell OC | F | N/R |
| Langer et al (2016)  <https://doi.org/1> 0.12788/jcso.0  181 | BRCA1 (N/R) | PMS2 (N/R) | N/R | N/R | F | N/R | USA | No variants - No phenotype |
| Pilié et al (2017)  <https://doi.org/1> 0.1002/cncr.30  817 | BRCA2 (N/R) | MLH1 c.N/R (p.A661fs) | N/R | PrC; KC, BlC | M | N/R | USA | No variants |
| Rosenthal et al (2017)  <https://doi.org/1> 0.1016/j.cancer gen.2017.09.00 3 | BRCA2 (N/R) | PMS2 (N/R) | N/R | N/R | N/R | N/R | USA | No variants - No phenotype |
| BRCA2 (N/R) | MSH6 (N/R) |
| BRCA2 (N/R) | MSH2 (N/R) |
| BRCA2 (N/R) | MLH1 (N/R) |
| BRCA1 (N/R) | PMS2 (N/R) |
| BRCA1 (N/R) | MSH2 (N/R) |
| BRCA1 (N/R) | MSH6 (N/R) |
| BRCA1 (N/R) | MLH1 (N/R) |
| Jordan et al (2017)  <https://doi.org/1> 0.1200/JCO.20  17.35.15_suppl  .4102 | BRCA2 (N/R) | PMS2 (N/R) | N/R | Stage IV PaC | N/R | N/R | USA | No variants |

| Ribeiro et al (2019)  <https://doi.org/1> 0.1093/annonc/ mdz268.010 | BRCA2 (N/R) | MSH6 (N/R) | N/R | "Young" GC | N/R | N/R | Brazil | No variants |
| --- | --- | --- | --- | --- | --- | --- | --- | --- |
| Szemes (2019) <https://doi.org/1> 0.1186/s13053-  019-0115-7 &  10.1038/s4143  1-019-0493-3 | BRCA2 (N/R) | MSH6 (N/R) | N/R | Inflammatory bowel disease; unaffected by cancer | M | 20 (R) | Slovakia | No variants |
| N/R | M | N/R |
| "Benign and borderline" colon polyps | M | N/R |
| Pritzlaff et al (2020)  <https://doi.org/1> 0.1038/s41436-  020-0830-5 | BRCA1 (N/R) | MSH6 (N/R) | N/R | PrC 46y; CRC 56y; KC  56y | M | 56 (T) | USA | No variants |
| BRCA2 (N/R) | PMS2 (N/R) | N/R | PrC 61y; BTC  63y | M | 63 (T) |
| Lhotova et al (2020)  <https://doi.org/1> 0.3390/cancers 12040956 | BRCA1 (N/R) | MLH1 (N/R) | N/R | BC, 38y; OC, 43y; EC, 58y | F | 58 (T) | Czech Republic | No variants |
| Kim et al (2021)  <https://doi.org/1> 0.1093/jncics/p kab007 | BRCA2 (N/R) | MSH2 (N/R) | N/R | N/R | N/R | N/R | USA | No variants - No phenotype |
| BRCA1 (N/R) | PMS2 (N/R) | N/R | N/R | N/R | N/R |
| Weitzel et al (2021)  <https://doi.org/1> 0.1007/s10549-  021-06201-y. | BRCA1 (N/R) | MSH2 (N/R) | N/R | Single Primary Breast Cancer (2 patients) | F | N/R | USA | No variants |
| BRCA1 (N/R) | MSH6 (N/R) | Single Primary Breast Cancer (2 patients) | F | N/R |
| BRCA1 (N/R) | PMS2 (N/R) | Single Primary Breast Cancer (5 patients) | F | N/R |
| BRCA2 (N/R) | MLH1 (N/R) | Single Primary Breast | F | N/R |

|  |  |  |  | Cancer (1 patients) |  |  |  |  |
| --- | --- | --- | --- | --- | --- | --- | --- | --- |
| BRCA2 (N/R) | MSH6 (N/R) | Single Primary Breast Cancer (3 patients) | F | N/R |
| BRCA2 (N/R) | PMS2 (N/R) | Single Primary Breast Cancer (6 patients) | F | N/R |
| Zikan et al (2021)  <https://doi.org/1> 0.1136/ijgc-202  1-ESGO.556 | N/R | N/R | N/R | N/R | N/R | N/R | Czech Republic | No variants - No phenotype |
| Padua-Bracho et al (2022) <https://doi.org/1> 0.3390/ijms231  911549 | BRCA2 (N/R) | MLH1 c.1459C>T  (o.Arg487*) | N/R | N/R | N/R | N/R | Mexico | No phenotype |
| BRCA2 c.9235del  (p.Val3079fs) | PMS2 c.485T>A  (p.Leu162*) | N/R | N/R | N/R | N/R |
| BRCA2  c.9699_9702del (p.Cys3233fs) | MSH2 c.942+3A>T | N/R | N/R | N/R | N/R |
| Lisitsa et al (2023)  <https://doi.org/1> 0.1038/s41431-  023-01339-3 | BRCA2 c.7879A>T  (p.Ile2627Phe) | MSH6  c.1421_1422dup (p.Gln475Cysfs*) | N/R | Multiple primary tumors | N/R | N/R | Russia | No phenotype |
| Mako et al (2023)  <https://doi.org/1> 0.1111/jog.1553  0 | BRCA2 (N/R) | MSH6 (N/R) | N/R | Unaffected | F | 31 (R) | Japan | No variants |
| Wei et al (2023) <https://doi.org/1> 0.1371/journal. pone.0286998 | BRCA1 (N/R) | MLH1 c.1499del (p.Ile500fs) | Asian | Endometroid EC, 50y | F | 50 (T) | USA | No BRCA1  variants |
| BRCA1 (N/R) | PMS2 c.1738A>T  (p.Lys580*) | Asian | Endometroid OC, 47y | F | 47 (R) |
| Laitman et al (2024)  <https://doi.org/1> 0.1007/s10549-  024-07454-z | BRCA2 (N/R) | MSH2 (N/R  missense variant) | N/R | CRC,  Paragangliom a | N/R | 25-30 (R) | Israel | No variants |
| N/R | Unaffected | N/R | 25-30 (R) |
| Saunders et al (2024)  <https://doi.org/1> | BRCA2 (N/R) | MLH1 (N/R) | N/R | "Aggresive" PrC, T4 N1 | M | 67 (D) | United Kingdom | No variants |

| 0.1016/j.euo.20  24.02.003 |  |  |  | M1, GC 9,  65y |  |  |  |  |
| --- | --- | --- | --- | --- | --- | --- | --- | --- |
| BRCA1 (N/R) | MSH2 (N/R) | N/R | "Aggresive" PrC, T3 N0 M0, GC 8, 60  y | M | 60 (T) |
| Tsoulos et al (2024)  <https://doi.org/1> 0.21873/cgp.20  463 | BRCA1 (N/R) | PMS2 (N/R) | N/R | N/R | N/R | N/R | Greece | No variants - No phenotype |
| BRCA2 (N/R) | MSH2 (N/R) | N/R | N/R | N/R | N/R |
| BRCA2 (N/R) | PMS2 (N/R) | N/R | N/R | N/R | N/R |
| Abu Shtaya et al (2025)  <https://doi.org/1> 0.1007/s10689-  024-00432-w | BRCA2 c.6174del  (p.Ser1982fs) | N/R | N/R | N/R | N/R | N/R | Israel | No LS  variants - No phenotype |
| BRCA1 c.68_69del (p.Glu23Valfs*17) | N/R | N/R | N/R | N/R | N/R |

**ESM1 abbreviatons:** BC: Breast cancer; BlC: Bladder Cancer; BTC: Biliary Tract Cancer; CRC: Colorectal Cancer; EC: Endometrial Cancer; GC: Gastric Cancer; KC: Kidney Cancer; OC: Ovarian Cancer; PaC: Pancreatic Cancer; PrC: Prostate Cancer.
