# Supplementary material
Source: Research Square preprint supplement (doi:10.21203/rs.3.rs-9646646/v1)
Supplement: Supplementary file 2 [file 53070b784519e229b0128917.docx]

**Table 2: “Characteristics of tumors found in gBRCA-LS patients”**

| **BRCA-related tumors (n=45)** | **LS-related tumors (n=47)** | | **Overlapping tumors (n=16)** | **Non-related tumors (n=12)** |
| --- | --- | --- | --- | --- |
| **Breast (n=42)** | **Colorectal (n=21)** | **Endometrial (n=16)** | **Ovarian cancer (n=9)** | Kidney (n=2) (clear cell;  renal pelvis)  Lung (n=2)  Thyroid  GIST  Leiomyosarcoma (spindle cell)  AML  Non-Hodgkin lymphoma  Vulvar SCC  Skin SCC  Sarcoma |
| **Gender**  Female: 26 (93%)  Male: 2 (7%)  **Median age**  First BC (n=37): 38,5y  Second BC (contralateral or side unknown; n=5): 46y  **Histology**  DCIS: 8 (50%)  IDC: 6 (37,5%)  Mixed / other: 2 (12,5%)  **IHC**  HR+: 6 (33%)  TN: 10 (56%)  Her2+: 2 (11%) | **Gender**  Female: 10 (55%)  Male: 8 (45%)  **Median age**  First CRC (n=20): 51,5y  Second CRC (n=2): 46.5y  **Location**  Right colon: 1 (12,5%)  Other: 7 (87,5%)  **MMR status**  MMRd: 5 (83%)*  MMRp: 1 (17%)  **MS status**  MSI-H: 3 (100%) | **Median age:** 46 y  **Histology**  Endometroid: 7 (78%)  Mixed: 1 (11%)  Carcinosarcoma: 1 (11%)  **MMR status**  MMRp: 1 (14%)  MMRd: 6 (86%)✝  **MS status**  MSS: 1 (20%)  MSI-L: 1 (20%)  MSI-H: 3 (60%) | **Median age:** 42,5y  **Histology**  Serous: 1 (50%)  Mucinous: 1 (50%)  **MMR status**  MMRd: 2 (100%)*  **MS status**  MSI-H: 1 (100%)  **LOH status**  BRCA LOH: 1 (50%)  LS LOH: 1 (50%) |
| **Melanoma (n=3)** | **Bladder and urinary tract tumors (n=4); Gastric cancer (n=3); Sebaceous carcinoma (n=2); CNS cancer (n=1)** | | **Prostate cancer (n=4)**  **Pancreatic cancer (n=3)** |  |

*****All concordant with their LS-gene

✝ n=4 (66%) concordant with their LS-gene

**Table 2 Abbreviations**: AML: Acute Myeloid Leukemia; BC: Breast Cancer; CRC: Colorectal cancer; DCIS: Ductal Carcinoma In Situ; GIST: Gastrointestinal Stromal Tumor; HR: Hormone Receptor; IDC: Invasive Ductal Cancer; IHC: immunohistochemistry; ILC: Invasive Lobular Cancer; MMRd: MMR deficient; MMRp: MMR proficient; MSI-H: Microsatellite Instability High; MSI-L: Microsatellite Instability Low; MSS: Microsatellite stable; SCC: Squamous Cell Carcinoma; TN: Triple Negative
