# Supplementary material
Source: Research Square preprint supplement (doi:10.21203/rs.3.rs-9646646/v1)
Supplement: Supplementary file 3 [file ed103e99566676c8ef9c6b38.docx]

**ESM2:** “gBRCA-LS patients reported in the literature”

| **Reference** | **Patient #** | **BRCA variant** | **LS variant** | **Ancestry / Ethnicity** | **Phenotype** | **Gender** | **Age at report (R), death (D), or last known tumor diagnosis (T)** | **Country of publication** |
| --- | --- | --- | --- | --- | --- | --- | --- | --- |
| Borg et al (2000) | 1 | BRCA1: c.3048_3052dup (p.Asn1018Metfs*8) | MLH1: c.131C>T (p.Ser44Phe) | N/R | TNBC (Grade III, ductal and papillary, Ki67>50%), MSI-L 35y | F | 46 (R) | Sweden and Finland |
| Thiffault et al (2004) | 2 | BRCA2: c.314T>G (p.Leu105*) | MSH2: c.1278_1386+1del (p.Lys427Glyfs*4) | N/R | LBC, ER+, PR+, Her2-, LCIS, separate foci of DCIS, 32y; Endometroid EC (weak stain for MLH1 and MSH2, MSI-L age N/R); villotubular colon polyp, dMSH2, MSI-H, 40y | F | 40 (T) | Canada and Australia |
| 3 | CRC 32y | M | 36 (D) |
| Brandt et al (2011) | 4 | BRCA1: c.3607C>T (p.Arg1203Ter) | MSH2: c.1396del (Protein truncation at aminoacid position 470) | N/R | BC, 38y; EC, 43y; contralateral BC, 49y; Multiple colonic polyps (at least one was adenomatous in the proximal ascending colon) | F | 49 (T) | USA |
| Kast et al (2012) | 5 | BRCA1: c.213-12A>G | MSH6: c.515dup (p.Leu173Thrfs*9) | N/R | Endometroid EC (pT1a pNx G3, FIGO IA), dMSH6, 46 y | F | 51 (R) | Germany |
| Gong et al (2012) | 6 | BRCA2: c.5946del (p.Ser1982Argfs*22) | MLH1: c.677G>T (p.Arg226Leu) | N/R | Endometroid EC, dMLH1 and dPMS2, weak staining for MSH6, MSI-H, 41y | F | 41 (R) | USA |
| MSH6: c.3959_3962del (p.Ala1320fs) |
| Pedroni et al (2013) | 7 | BRCA1; c.300T>G (p.Cys61Gly) | MLH1: c.1480dup (p.Arg497Profs*6) | Northern Italy | Ductal BC, HR-, T4N0M0, MSI, dMLH1, Ki67 65%, 35y, MLH1 and BRCA1 LOH; Endometroid EC, MSI-H, dMLH1, MLH1 LOH, 39y; Ovarian adenocarcinoma, MLH1 LOH 39y; Clear cell KC 39y; Contralateral TNBC, MSI, dMLH1, MLH1 and BRCA1 LOH 46y | F | 46 (D) | Italy |
| Tung et al (2016) | 8 | BRCA1: c.5503C>T (p.Arg1835*) | PMS2: c.137G>T (p.Ser46Ile) | N/R | HR- HER2+ BC; LC | F | 33 (T) | USA |
| Susswein et al (2016) | 9 | BRCA1: c.68_69del (p.Glu23Valfs*17) | PMS2: c.137G>T (p.Ser46Ile) | N/R | GC | F | N/R | USA |
| Yurgelun et al (2017) | 10 | BRCA2: c.3199del (p.Thr1067fs*10) | MLH1: Exons 16-19 deletion | Non-Hispanic White | Stage IV CRC (Sigmoid), dMMR, KRAS G13D, 31y | M | 31 (T) | USA |
| Jun-Yan et al (2018) | 11 | BRCA1: c.5470_5477del (p.Ile1824fs) | PMS2: c.1053del (p.Leu351fs) | N/R | BC | N/R | N/R | China |
| 12 | BRCA2; c.8402_8403insAAAA (p.Phe2801fs) | MSH2: c.645+1G>A | N/R | BC | N/R | N/R |
| MSH2: c.2210+2->CTGCAACCAAAGATTCATTAATAATCATAGATGAATTGGG | N/R |
| Ouyang et al (2019) | 13 | BRCA1: c.1016del (p.His339Thrfs*2) | MSH6: c.1483C>T (p.Arg495*) | N/R | OC, 43y | F | 43 (T) | China |
| 14 | BRCA2: c.3577del (p.Ala1193Leufs4*) | PMS2: c.2140C>T (p.Gln714*) | N/R | TNBC, 64y | N/R | 64 (T) |
| Tian et al (2019) | 15 | BRCA1: c.5470_5477del (p.Ile1824Aspfs*3) | PMS2: c.2381_2384dup (p.Val796Trpfs*29) | N/R | Stage II endometroid EC, dPMS2, 39 y; OC, dPMS2 42y | F | 42 (T) | China |
| 16 | CRC, 62y | F | 66 (R) |
| Zheng et al (2020) | 17 | BRCA1; c.3348_3351del (p.Val1117Argfs*11) | MSH2: Exons 4-16 deletion | N/R | Stage III serous and endometroid with squamous differentiation EC, dMSH2 and dMSH6, MSI-H, TMB-H, 52y. Paraaortic lymph node recurrence | F | 54 (R) | China |
| 18 | N/R | Unaffected | M | N/R |
| Sorscher et al (2020) | 19 | BRCA2; c.1310_1313del (p.Lys437llefs*22) | MLH1: c.1381A>T (p.Lys461*) | N/R | AML in remmision for 26 years; Vulvar SCC with basaloid features 47y; TPBC, dMLH1 and dPMS2, TMB 18Mut/Mb, likely LOH of the wildtype alleled for BRCA2 and MLH1, 48y | F | 52 (R) | USA |
| Chang et al (2020) | 20 | BRCA1: c.4729C>T (p.Gln1577*) | MLH1: c.793C>T (p.Arg265Cys) | N/R | Stage IV CRC (Transverse), 48y | F | 48 (T) | Taiwan |
| Ferrer-Avargues et al (2021) | 21 | BRCA2: c.3492dup (p.His1165Serfs*19) | MLH1: c.1717_1718del (p.Val573Serfs*11) | N/R | CRC 49y | M | 60 (R) | Spain |
| 22 | CRC 43y; OC 53y | F | 57 (D) |
| 23 | Unaffected | M | 28 (R) |
| 24 | BRCA1: c.5152+5G>A | MLH1: c.701del (p.Glu234Glyfs*5) | N/R | CRC 59y; EC 60y | F | 72 (R) |
| 25 | Unaffected | M | 45 (R) |
| 26 | Unaffected | M | 47 (R) |
| Laish et al (2021) (Including one family from Goldberg et al (2009)) | 27 | BRCA1: c.68_69del (p.Glu23Valfs*17) | MSH2: c.1906G>C (p.Ala636Pro) | Ashkenazi Jew | Urothelial BlC 42y; TA-LGD<10 mm×5 (62–74) | M | 74 (R) | Israel |
| 28 | BRCA2: c.5946del (p.Ser1982Argfs*22) | MSH6: c.3984_3987dup (p.Leu1330fs) | TA-LGD<10 mm×3, 70y; Ascending CRC, dMSH6, MSI-H, 76y; Glioblastoma multiforme 91y | M | 91 (D) |
| 29 | Intraductal BC 49y; Intraductal BC 59y; T-cell Non-Hodgkins lymphoma 60y; Cutaneous SCC 63y; Melanoma 66y | F | 67 (R) |
| 30 | Endometroid EC 53y | F | 63 (R) |
| 31 | Unaffected | M | 37 (R) |
| 32 | BRCA2: c.5946del (p.Ser1982Argfs*22) | MSH6: c.3956_3957dup (p.Ala1320fs) | GIST 62y; TA-LGD>10 mm×1, 65y | M | 67 (R) |
| 33 | DCIS 40y | F | 41 (R) |
| 34 | Unaffected | F | 31 (R) |
| 35 | BRCA2: c.5946del (p.Ser1982Argfs*22) | MSH2: c.1906G>C (p.Ala636Pro) | Melanoma 65y; PrC 72y; Urothelial BlC 72y | M | 78 (R) |
| 36 | Intraductal BC 36y; Intraductal BC 42y | F | 44 (R) |
| 37 | Unaffected; TA-LGD<10 mm X1 40y | M | 50 (R) |
| Levine et al (2021) | 38 | BRCA1: c.5558dup (p.Tyr1853*) | PMS2: c.736_741delinsTGTGTGTGAAG (p.Pro246Cysfs*3) | N/R | BC, 40y; Stage IA, High grade Endometrial Carcinosarcoma, MMRp, MSS, 56y | F | 56 (R) | USA |
| Duzkale et al (2021) | 39 | BRCA2: c.1773_1776del (p.Ile591Metfs*22) | MSH6: c.3820G>T (p.Glu1274*) | N/R | BC, 40y; CRC, 55y | F | 57 (R) | Turkey |
| 40 | BRCA2: c.977G>A (p.Ser326Asn) | MSH2: c.775C>T (p.Pro259Ser) | N/R | BC, 45y; TC, 50y | F | 55 (R) |
| Infante et al (2022) | 41 | BRCA2: c.5146_5149del (p.Tyr1716Lysfs*8) | PMS2: c.903G>T (p.Lys301Asn) | N/R | HR+, HER2- infiltrating ductal BC 40y; CRC, dPMS2, 54y | F | 54 (R) | Spain |
| 42 | Unaffected | M | 52 (R) |
| 43 | Unaffected | F | 49 (R) |
| 44 | Unaffected | F | 46 (R) |
| Megid et al (2022) | 45 | BRCA2: c.2516dup (p.Tyr839*) | PMS2: c.2182_2184delinsG (p.Thr728Alafs) | N/R | Luminal BC | F | 49 (R) | Brazil |
| Zhang et al (2022) | 46 | BRCA2: c.7540A>G (p.Lys2514Glu) | MLH1: c.1937A>G (p.Tyr646Cys) | N/R | GC | M | N/R | China |
| Poliani et al (2022) | 47 | BRCA1: c.3351dup (p.Gln1118Serfs*4) | MSH6: c.2848_2849del (p.Ser950Profs*15) | N/R | CRC ≤50y | N/R | N/R | Italy |
| Akbar et al (2022) | 48 | BRCA1: Exons 1-2 deletion | MSH6: c.3261del (p.Phe1088Serfs*2) | N/R | TNBC, 30y | N/R | 30 (T) | Pakistan |
| Ozer et al (2022) | 49 | BRCA1: c.68_69del (p.Glu23Valfs*17) | MSH2: c.1906G>C (p.Ala636Pro) | Ashkenazi Jew | Poorly differentiated PaC with liver metastasis, MSS, dMSH2 and dMSH6, No LOH for wtBRCA1 allele, 56y | F | 57 (R) | USA |
| 50 | BRCA2: c.6468_6469del (p.Gln2157Ilefs*18) | PMS2: c.1831delinsTT (p.Ile611Phefs*2) | Italian | Poorly differentiated PaC, MSS, pT3N0, LOH  of the wild-type BRCA2 allele, 75y; Local recurrence, 82y | M | 82 (D) |
| 51 | Unaffected | M | 43 (R) |
| 52 | BRCA1: c.4065_4068del (p.Asn1355Lysfs*10) | MLH1: c.232G>T (p.Glu78*) | Spanish | Stage IV RC with liver metastasis, MSI-H, dMLH1 and dPMS2, elevated TMB, LOH of wild-type MLH1, 32y | M | 34 (R) |
| de Oliveira et al (2022) | 53 | BRCA1: c.5216A>G (p.Asp1739Gly) | MSH6: c.3724_3726del (p.Arg1242del) | N/R | BC | N/R | N/R | Brazil |
| Cock-Rada et al (2022) | 54 | BRCA1: c.3331_3334del (p.Gln1111Asnfs*5) | PMS2: Exons 8-10 deletion | N/R | BC | N/R | N/R | Colombia |
| Harada et al (2023) | 55 | BRCA2: c.8016del (p.Lys2674fs*2) | MSH2: Intron 7 partial duplication (Stop codon at codon 427) | Japanese | Mucinous OC, 28y; lung-origin mucinous adenocarcinoma or lung metastasis of the  previous OC plus other metastasis, 35y; metastatic mucinous adenocarcinoma in the brain, dMSH2 and dMSH6, KRAS G12D, MSI-H, TMB-H, possible LOH of the wildtype BRCA2 allele36y | F | 36 (R) | Japan |
| 56 | RC, 43y; CRC, 51y; BlC 54y; Renal pelvis cancer, 64y; GC, 67y | M | 67 (R) |
| Kral et al (2023) | 57 | BRCA1: c.5266dup (p.Gln1756Profs*74) | MLH1: c.1483dup (p.His495Profs*29) | N/R | Endometroid EC, 48y; OC and BC, ages unknown. | F | 48 (T) | Czech Republic |
| Kwong et al (2024) | 58 | BRCA1: c.3342_3345del (p.Glu1115*) | MSH6: c.3013C>T (p.Arg1005*) | N/R | TNBC 34y | F | 34 (T) | China |
| Kansuttiviwat (2024) | 59 | BRCA2: c.451_454dup (p.Thr152fs) | MSH6: c.628-1G>A | N/R | BC | M | N/R | Thailand |
| Custodio-Cabello et al (2024) | 60 | BRCA2: c.1053dup (p.Tyr352Ilefs*6) | MSH6: c.3378del (p.Ala1127Profs*18) | Caucasian | Metastatic Hormone-Sensitive PrC, >60y | M | >60 (T) | Spain |
| Aguilar et al (2025) | 61 | BRCA1: Exons 16-17 deletion | MSH6: c.2150_2153del (p.Val717Alafs) | N/R | Stage IIIB TNBC, 46y | F | 46 (T) | Mexico |
| Yuen et al (2025) | 62 | BRCA1: c.(?_-1)_(80+1_81-1)del | MLH1: c.2081-1G>A | Chinese | BC, 36y | F | 36 (T) | Singapore |
| 63 | BRCA1: c.(134+1_135-1)_(212+1_213-1)del | MLH1: c.(453+1_454-1)_(545+1_546-1)del | Chinese | EC, 31y; OC, 31y | F | 31 (T) |
| 64 | BRCA1: c.1058G>A (p.Trp353*) | EPCAM: c.(?_-1)_(*1_?)del (p.0?) | Chinese | Papillary OC, 52y; Invasive ductal BC, ER/PR+ Her2- 52y | F | 52 (T) |
| Puglisi et al (2025) | 65 | BRCA2: c.4127_4130del (p.Gly1376Alafs*11) | PMS2 exons 6-8 deletion | African American | Metastatic, Gleason 7 (3+4) PrC, 58y; LC (bronchogenic adenocarcinoma with prior asbestos exposure), 59y; Metastatic pancreatic cancer, 62y | M | 62 (T) | USA |
| Neumman et al (2025) | 66 | BRCA2: c.5350_5351del (p.Asn1784fs) | MSH6: c.694C>T (p.Gln232Ter) | N/R | CRC, 70y | F | 70 (T) | USA |
| 67 | BRCA2: c.5946del (p.Ser1982Argfs*22) | PMS2: c.943C>T (p.Arg315Ter) | N/R | Unaffected | F | N/R |
| 68 | BRCA2: c.6037A>T (p.Lys2013*) | MSH2 c.942+3A>T | European | Melanoma, 45y; CRC, 58y | M | 58 (T) |
| 69 | Unaffected | M | N/R |
| 70 | BRCA1: c.3756_3759del (p.Ser1253fs) | PMS2: c.2095G>C (p.Asp699His) | N/R | OC, 62y | F | 62 (T) |
| 71 | BRCA1: c.5071dup | PMS2: c.3G>A (p.Met1Ile) | N/R | Unaffected | F | N/R |
| 72 | BRCA2: c.2833_2834insTT (p.Lys945fs) | MSH6 c.3656C>A (p.Thr1219Asn) ‡ | N/R | Bilateral BC, 41y; EC, 43y; CRC, 55y; Sebaceous Carcinoma, 68y | F | 68 (T) |
| 73 | BRCA2: c.5946del (p.Ser1982Argfs*22) | PMS2 dup exons 11-12 | N/R | DCIS, 38y | F | 38 (T) |
| 74 | BRCA1: c.5266dup (p.Gln1756fs) | MSH2: c.1276+1G>A | N/R | PrC, 57y; Sebaceous carcinoma, 62y | M | 62 (T) |
| 75 | BRCA1: c.5096G>A (p.Arg1699Gln) | MSH6: c.578del (p.Leu193fs) | N/R | Sarcoma, 57y | M | 57 (T) |
| Pócza et al (2025) & Nagy et al (2025) ✝ | 76 | BRCA1: c.5266dup (p.Gln1756Profs*74) | MSH6: c.3261del (p.Phe1088Serfs*2) | N/R | Invasive ductal TNBC, 22y | F | 22 (T) | Hungary |
| 77 | BRCA1: c.181T>G (p.Cys61Gly) | MSH6: c.3379_3438+5del | N/R | Unaffected | F | N/R |
| 78 | BRCA2: c.5073dup (p.rp1692Metfs*3) | MSH6: c.3379_3438+5del | N/R | Invasive ductal TNBC, 35y | F | 35 (T) |
| Sanabria - Salas et al (2025) | 79 | BRCA1: c.3331_3334del (p.Gln1111Asnfs*5) | MSH6: c.3766dup (p.Tyr1256Leufs*19) | N/R | BC, 37y | N/R | 37 (T) | Colombia |
| 80 | BRCA1: c.1674del (p.Gly559Valfs*13) | PMS2: c.1855del (p.Asp619Thrfs*4) | N/R | BC, 58y | N/R | 58 (T) |
| Potrony et al (2025) | 81 | BRCA2: c.3624dup (p.Gln1089Serfs*10) | MSH6: c.3725G>A (p.Arg1242His) | N/R | TNBC, 31y | N/R | 31 (T) | Spain |
| LOVD database of MINAS reports | 82 | BRCA1: c.427G>T (p.Glu143*) | MSH6: c.3847_3850dup (p.Thr1284Asnfs*6) | N/R | EC, 60y | F | 60 (T) | United Kingdom |
| 83 | BRCA1: c.5074+2T>C | PMS2: c.1119_1122del (p.Gln374Serfs*10) | N/R | BC, 29y | F | 29 (T) | Brazil |
| This work | 84 | BRCA2: c.8755-1G>A | MSH2: c.2539_2542del (p.Lys847Profs*44) | European, Sepharadic Jew and South American | Stage II T3N0M0 CRC, dMSH2 and dMSH6, MSS, 29y; HR+ DCIS, MSS 32y | F | 42 (R) | Argentina |
| 85 | BRCA1: c.68_69del (p.Glu23Valfs*17) | MSH2: c.1906G>C (p.Ala636Pro) | Ashkenazi Jew | Stage III  dMSH2 and dMSH6 endometroid EC and fumarate hydratase deficient spindle cell leiomyosarcoma, 44y | F | 52 (R) |
| 86 | Unaffected | F | 54 (R) |
| 87 | EC 58y | F | 80 (R) |
| 88 | BRCA1: c.211A>G (p.Arg71Gly) | PMS2: c.1687C>T (p.Arg563*) | Italian and Spanish | Stage IV CRC, dPMS2, MSI-H, 41y; BRAF WT CRC, 42y | F | 51 (R) |
| 89 | BRCA1: c.5123C>A (p.Ala1708Glu) | PMS2: c.137G>T (p.Ser46Ile) | Italian and Spanish | TNBC 48y | F | 64 (R) |
| 90 | Unaffected | M | 29 (R) |
| 91 | BRCA2: c.5946del (p.Ser1982Argfs*22) | PMS2: exons 1-15 deletion | Ashkenazi Jew | HR+ Her2- mucinous and micropapillary invasive BC, 72y | M | 72 (R) |
| 92 | BRCA1: c.68_69del (p.Glu23Valfs17) | MSH6 c.3959_3962del (p.Ala1320Glufs*6) | Ashkenazi Jew | MMRp RC, 55y | M | 60 (R) |

**ESM2 abbreviatons:**: AML: Acute Myeloid Leukemia; BlC: Bladder Cancer; CRC: Colorectal Cancer; RC: Rectal Cancer; DCIS: Ductal Carcinoma In Situ; EC: Endometrial Cancer; ER: Estrogen Receptor; G: Gender; GC: Gastric Cancer; GIST: Gastrointestinal Stromal Tumor; HR: Hormone Receptor; KC: Kidney Cancer; LC: Lung Cancer; LCIS: Lobular Carcinoma In Situ; LBC: Lobular Breast Cancer; LOH: Loss of Heterozygosity; MMRd: MMR deficient; MMRp: MMR proficient; MSI-L/MSI-H: Microsatellite Instability Low / High; MSS: Microsatellite Stable; OC: Ovarian Cancer; PaC: Pancreatic Cancer; PrC: Prostate Cancer; PR: Progesterone Receptor; Pt: Patient; RC: Rectal Cancer; SCC: Squamous Cell Carcinoma; TA-LGD: Tubular Adenoma - Low Grade Dysplasia; TC: Thryoid Cancer; TMB: Tumor Mutational Burden; TNBC: Triple Negative Breast Cancer; TPBC: Triple Positive Breast Cancer

*We were unable to independently assess the pathogenicity of this variant

✝ Patient #76 is likely a duplicate reported in both studies

‡ This variant is reported as a VUS in Clinvar but determined to be probably pathogenic by the authors of the referenced article
